# Supplementary material for: Phylogeny and Metabolic Potential of the Candidate Phylum SAR324
Source: Biology (Basel). 2022 Apr 14;11(4):599. doi: 10.3390/biology11040599 (PMC9031357; doi:10.3390/biology11040599)
Supplement: Supplementary file 1 [file biology-11-00599-s001.zip › biology-1659073-supplementary.pdf]

## **Supplementary Information:**

### **Phylogeny and metabolic potential of the phylum SAR324**

Lukas Malfertheiner<sup>1</sup>, Clara Martínez-Pérez<sup>1,2</sup>, Zihao Zhao<sup>1</sup>, Gerhard J. Herndl<sup>1,3</sup>, Federico Baltar<sup>1\*</sup>

<sup>1</sup> Department of Functional and Evolutionary Ecology, University of Vienna, 1090 Vienna, Austria

<sup>2</sup> Institute for Environmental Engineering, Department of Civil, Environmental and Geomatic Engineering, Eidgenössische Technische Hochschule (ETH) Zürich, 8093 Zurich, Switzerland

<sup>3</sup> NIOZ, Department of Marine Microbiology and Biogeochemistry, Royal Netherlands Institute for Sea Research, Utrecht University, 1790 AB Den Burg, Texel, The Netherlands

#### **Contains:**

- Figure S1-S3

- Tables S1-S2

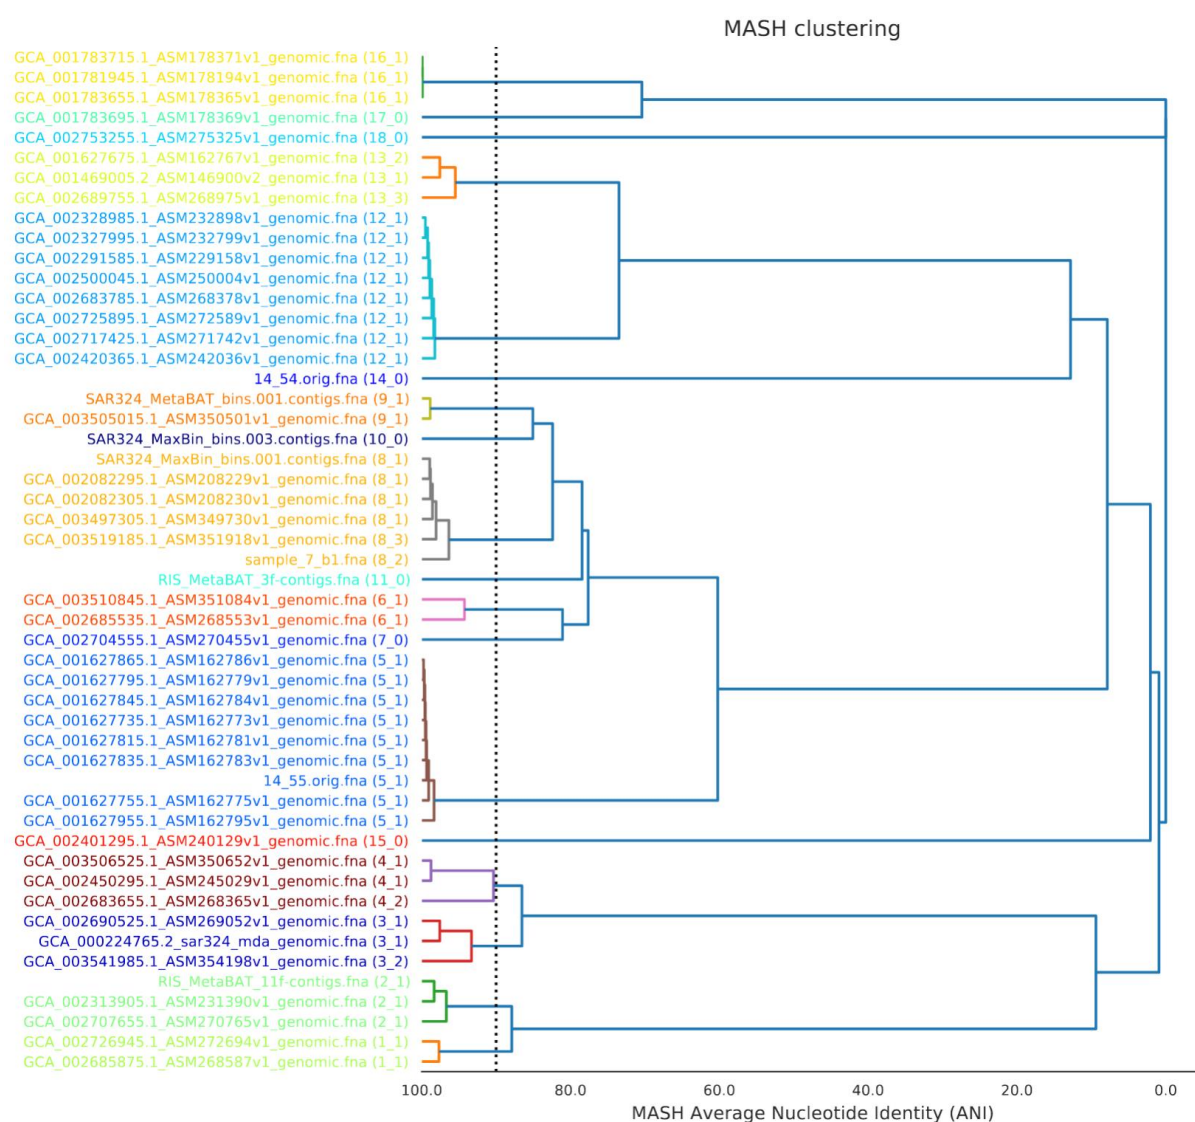

**Figure S1.** Dereplication process. Out of very similar genomes, the best representative was chosen based mostly on completion and contamination percentages (see dRep score, Supplementary Table 1) for downstream analysis.

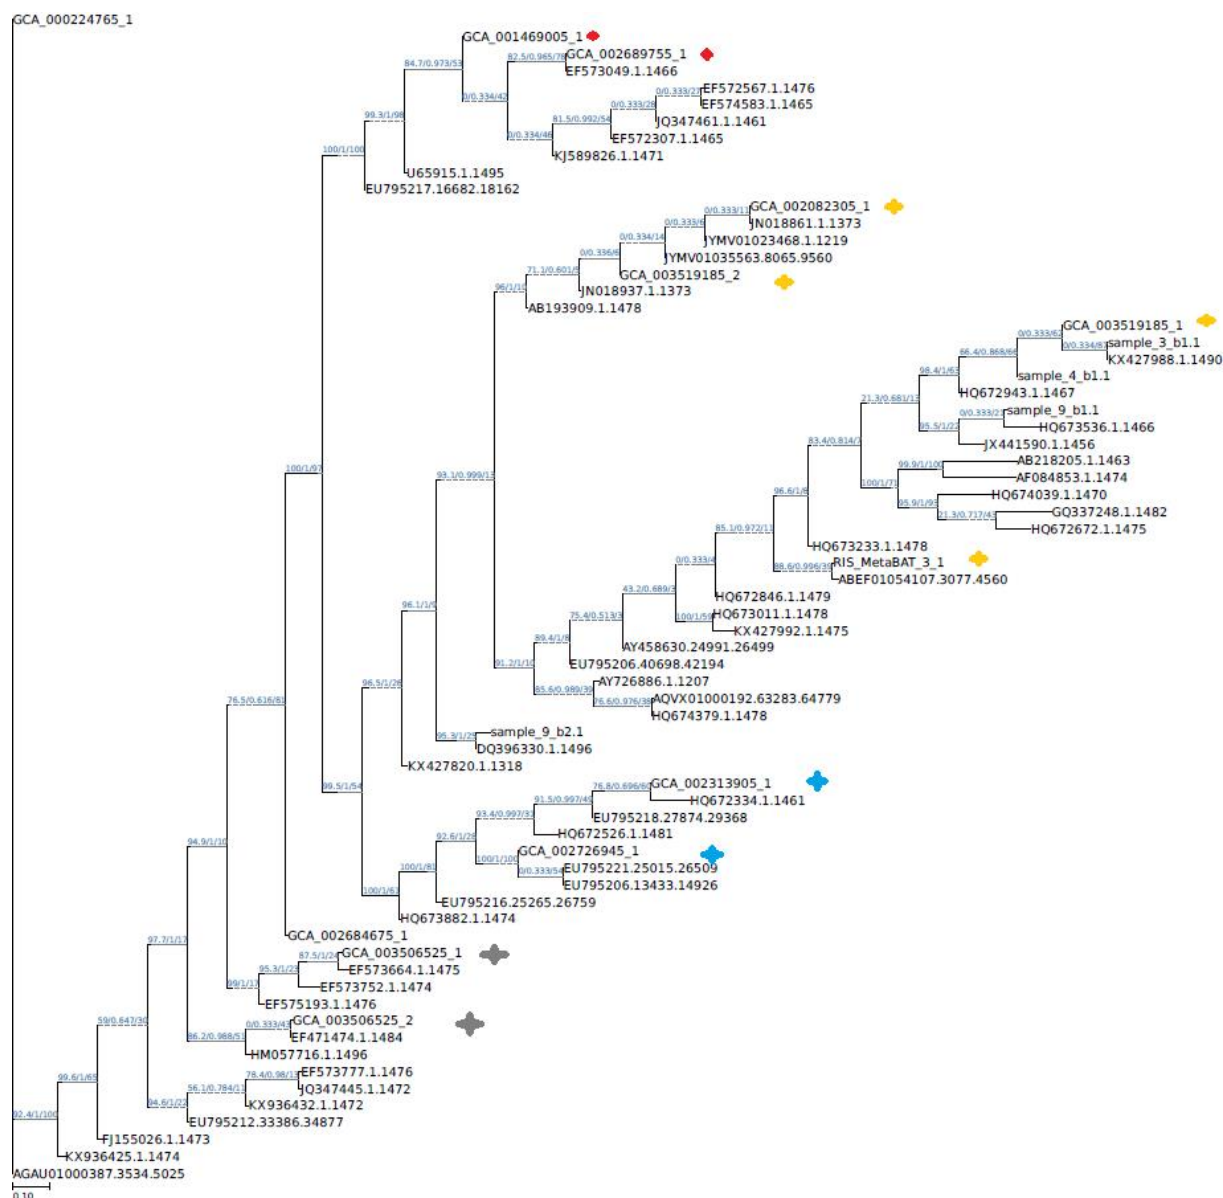

**Figure S2.** Maximum likelihood tree (IQtree) with 16s rRNA sequences. Red dots indicate sequences from MAGs belonging to Group 2C, blue dots to 2B, yellow dots to 2D and grey dots to 2A.

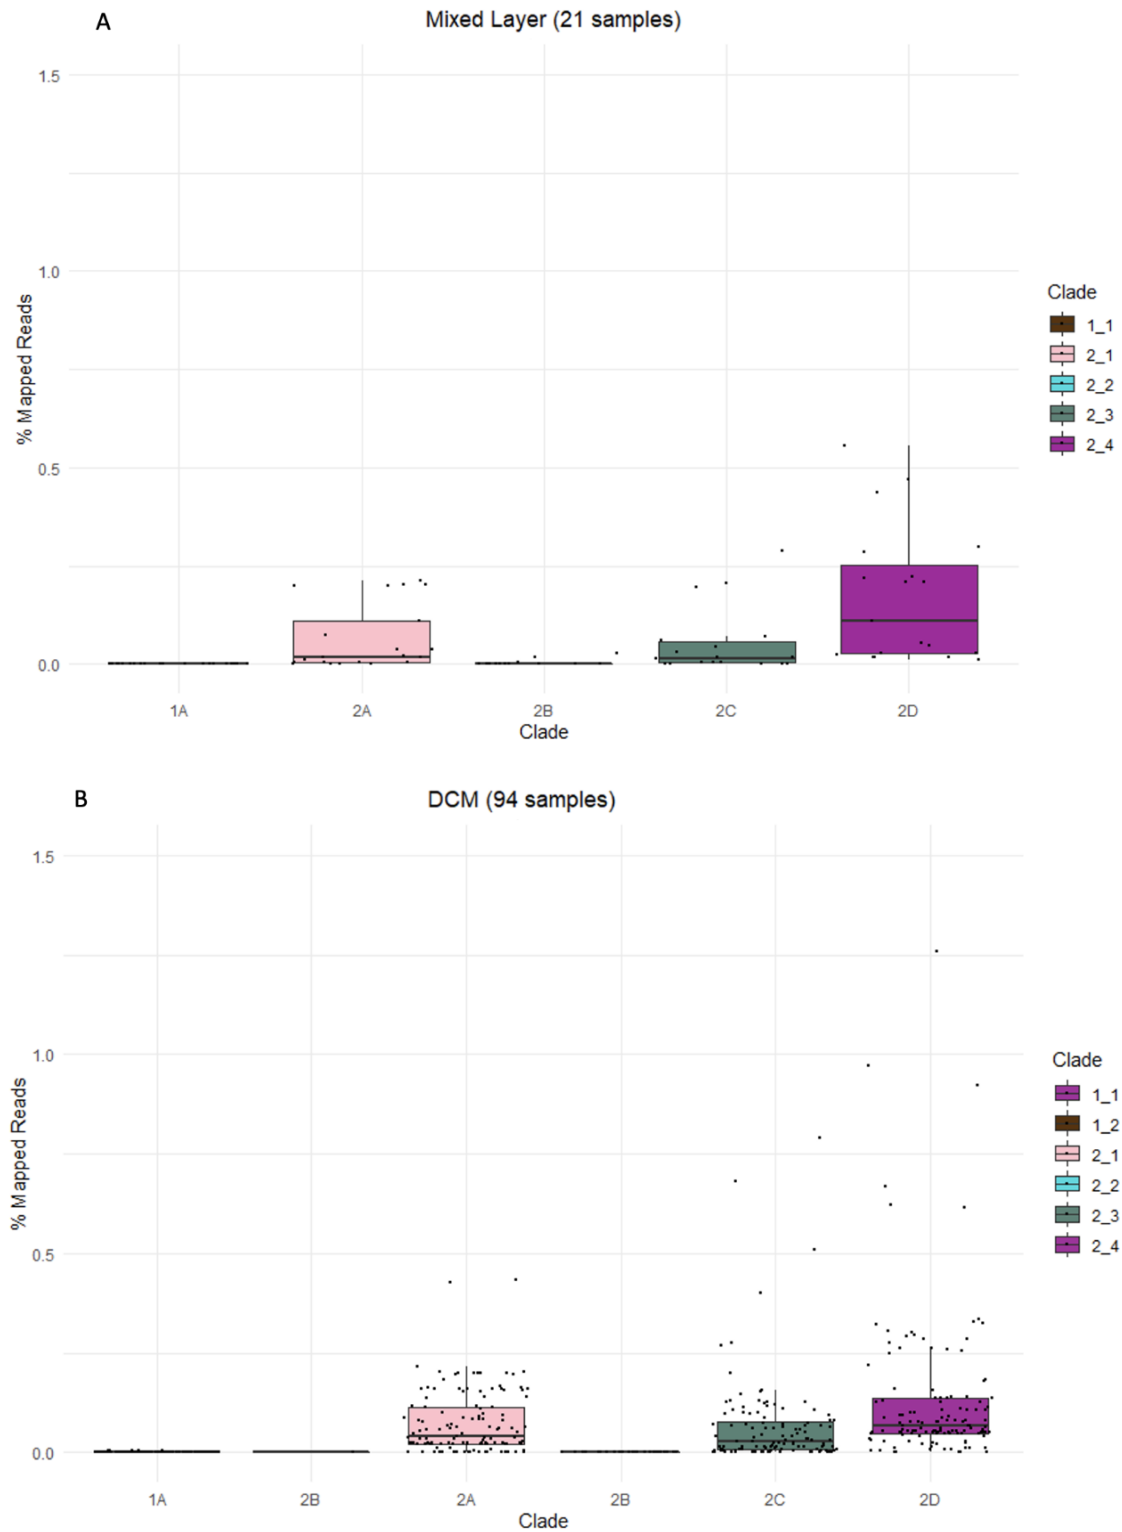

**Figure S3.** Bar plots showing the percentage of metatranscriptomic reads that mapped to the respective SAR324 clades relative to the total amount of reads present in each sample on the x-axis. 2A, 2C and especially 2D all appear to be active in the mixed layer (A) of the ocean as well as in the DCM (B).

**Table S1.** Origins and quality information of all the genomes used in this study.

| ID            | Environment                                                                      | Completeness | Contamination | Genome size (mbp) | GC    | score            |
|---------------|----------------------------------------------------------------------------------|--------------|---------------|-------------------|-------|------------------|
| GCA_000213335 | South Atlantic sub-tropical gyre (station KN192-5-11)                            | 50.69        | 0.0           | 2.16              | 41.1  | Failed Threshold |
| GCA_000213355 | North Pacific sub-tropical gyre (Hawaii Ocean Time-series (HOT) station ALOHA)   | 44.71        | 0.22          | 2.26              | 41.48 | Failed Threshold |
| GCA_000224765 | single cell collected from Scripps Research Pier at 6 m depth                    | 70.44        | 0.16          | 4.26              | 43.32 | 71.94            |
| GCA_000375785 | -                                                                                | 25.35        | 3.97          | 1.39              | 39.28 | Failed Threshold |
| GCA_000375805 | -                                                                                | 25.63        | 0.0           | 0.86              | 40.69 | Failed Threshold |
| GCA_001469005 | Red Sea water column Station 34 - depth 10m                                      | 89.09        | 0.0           | 3.49              | 47.1  | 90.22            |
| GCA_001627675 | Red Sea water column Station 34 - depth 25m                                      | 72.17        | 2.94          | 2.54              | 47.46 | 59.14            |
| GCA_001627685 | Red Sea water column Station 22 - depth 50m                                      | 53.99        | 0.05          | 1.73              | 47.25 | Failed Threshold |
| GCA_001627735 | Red Sea water column Station 149 - depth 500m                                    | 86.3         | 0.0           | 3.12              | 42.82 | 88.68            |
| GCA_001627755 | Red Sea water column Station 34 - depth 258m                                     | 81.39        | 1.73          | 2.79              | 42.4  | 74.93            |
| GCA_001627765 | Red Sea water column Station 22 - depth 200m                                     | 53.97        | 4.09          | 2.12              | 43.25 | Failed Threshold |
| GCA_001627795 | Red Sea water column Station 22 - depth 500m                                     | 89.26        | 0.0           | 3.35              | 42.85 | 91.68            |
| GCA_001627815 | Red Sea water column Station 91 - depth 500m                                     | 86.15        | 0.05          | 3.05              | 42.85 | 88.18            |
| GCA_001627835 | Red Sea water column Station 169 - depth 500m                                    | 85.52        | 2.6           | 3.04              | 43.0  | 74.63            |
| GCA_001627845 | Red Sea water column Station 192 - depth 500m                                    | 89.54        | 0.0           | 3.17              | 42.89 | 91.93            |
| GCA_001627865 | Red Sea water column Station 108 - depth 500m                                    | 89.26        | 0.0           | 3.3               | 42.85 | 91.71            |
| GCA_001627895 | Red Sea water column Station 169 - depth 50m                                     | 50.79        | 0.84          | 1.37              | 46.86 | Failed Threshold |
| GCA_001627915 | Red Sea water column Station 22 - depth 25m                                      | 50.43        | 0.94          | 1.75              | 46.77 | Failed Threshold |
| GCA_001627955 | Red Sea water column Station 108 - depth 200m                                    | 66.99        | 0.91          | 2.26              | 42.52 | 64.79            |
| GCA_001627975 | Red Sea water column Station 34 - depth 200m                                     | 60.05        | 3.12          | 1.95              | 42.39 | Failed Threshold |
| GCA_001781945 | Rifle well CD01 at 16ft depth; 0.1 micron filter at time point D, USA: Rifle, CO | 91.96        | 1.68          | 3.12              | 56.51 | 86.02            |
| GCA_001781965 | Rifle well CD01 at 16ft                                                          | 48.02        | 0.0           | 1.97              | 48.3  | Failed           |

|               |                                                                                  |       |      |      |       |                  |
|---------------|----------------------------------------------------------------------------------|-------|------|------|-------|------------------|
|               | depth; 0.1 micron filter at time point D, USA: Rifle, CO                         |       |      |      |       | Threshold        |
| GCA_001783655 | Rifle well CD01 at 16ft depth; 0.1 micron filter at time point D, USA: Rifle, CO | 91.96 | 1.68 | 3.09 | 56.5  | 86.02            |
| GCA_001783695 | Rifle well CD01 at 16ft depth; 0.1 micron filter at time point D, USA: Rifle, CO | 91.83 | 1.68 | 3.14 | 49.59 | 84.97            |
| GCA_001783715 | Rifle well CD01 at 16ft depth; 0.1 micron filter at time point D, USA: Rifle, CO | 91.96 | 1.68 | 3.08 | 56.53 | 86.01            |
| GCA_002082285 | hydrothermal plumes on the South Mid-Atlantic Ridge                              | 31.82 | 0.0  | 0.98 | 41.22 | Failed Threshold |
| GCA_002082295 | hydrothermal plumes on the South Mid-Atlantic Ridge                              | 89.51 | 0.0  | 2.93 | 42.41 | 91.71            |
| GCA_002082305 | hydrothermal plumes on the South Mid-Atlantic Ridge                              | 90.35 | 0.0  | 2.8  | 42.3  | 92.57            |
| GCA_002082535 | hydrothermal plumes on the South Mid-Atlantic Ridge                              | 61.89 | 0.05 | 1.44 | 42.94 | Failed Threshold |
| GCA_002291585 | marine                                                                           | 86.66 | 0.84 | 3.83 | 45.59 | 84.55            |
| GCA_002313905 | marine                                                                           | 81.27 | 0.84 | 3.15 | 55.43 | 79.13            |
| GCA_002327995 | marine                                                                           | 87.04 | 0.84 | 4.04 | 45.73 | 85.02            |
| GCA_002328985 | marine                                                                           | 86.78 | 1.73 | 4.07 | 45.72 | 80.31            |
| GCA_002401295 | Atlantic Ocean: North Pond, oxic seafloor aquifer                                | 69.22 | 2.95 | 3.08 | 41.71 | 55.67            |
| GCA_002420365 | marine                                                                           | 69.3  | 0.84 | 2.47 | 46.24 | 67.33            |
| GCA_002450295 | marine                                                                           | 68.29 | 0.11 | 3.12 | 45.93 | 69.86            |
| GCA_002500045 | marine                                                                           | 83.44 | 4.76 | 3.58 | 45.49 | 62.39            |
| GCA_002683655 | Chile-Peru Current Coastal Province, 5-1000m (TARA)                              | 80.16 | 2.33 | 3.15 | 46.19 | 71.0             |
| GCA_002683785 | Chile-Peru Current Coastal Province, 5-1000m (TARA)                              | 85.57 | 1.68 | 3.64 | 46.54 | 80.23            |
| GCA_002684675 | Chile-Peru Current Coastal Province, 5-1000m (TARA)                              | 62.83 | 2.1  | 2.32 | 45.51 | Failed Threshold |
| GCA_002685535 | Chile-Peru Current Coastal Province, 5-1000m (TARA)                              | 87.85 | 2.75 | 7.29 | 46.09 | 78.79            |
| GCA_002685875 | Northwest Arabian Sea Upwelling Province, 5-1000m (TARA)                         | 66.06 | 0.84 | 1.66 | 57.69 | 63.91            |
| GCA_002687455 | Northwest Arabian Sea Upwelling Province, 5-1000m (TARA)                         | 58.51 | 0.84 | 2.08 | 42.61 | Failed Threshold |
| GCA_002689755 | Mediterranean Sea, 5-1000m (TARA)                                                | 65.12 | 0.85 | 2.05 | 46.5  | 62.74            |
| GCA_002690525 | Mediterranean Sea, 5-1000m (TARA)                                                | 80.24 | 1.68 | 3.12 | 44.81 | 73.98            |

|                         |                                       |       |      |      |       |                  |
|-------------------------|---------------------------------------|-------|------|------|-------|------------------|
| GCA_002699765           | North Atlantic Ocean , 5-1000m (TARA) | 62.02 | 0.93 | 2.08 | 56.89 | Failed Threshold |
| GCA_002704555           | Mediterranean Sea, 5-1000m (TARA)     | 69.42 | 1.05 | 1.97 | 38.89 | 66.38            |
| GCA_002707655           | South Atlantic Ocean , 5-1000m (TARA) | 64.44 | 1.12 | 1.79 | 56.68 | 62.12            |
| GCA_002716165           | South Pacific Ocean , 5-1000m (TARA)  | 59.27 | 0.84 | 1.35 | 35.98 | Failed Threshold |
| GCA_002717425           | South Pacific Ocean , 5-1000m (TARA)  | 80.42 | 3.36 | 3.62 | 45.97 | 68.48            |
| GCA_002725895           | North Pacific Ocean , 5-1000m (TARA)  | 77.91 | 3.43 | 3.92 | 46.07 | 63.09            |
| GCA_002726945           | North Pacific Ocean , 5-1000m (TARA)  | 89.88 | 2.2  | 2.6  | 57.34 | 82.12            |
| GCA_002730365           | North Pacific Ocean , 5-1000m (TARA)  | 54.22 | 0.84 | 1.74 | 46.47 | Failed Threshold |
| GCA_002753255           | Australia: Punkally Creek Sediment    | 78.03 | 0.96 | 5.06 | 41.83 | 74.65            |
| GCA_003506525           | marine                                | 72.8  | 0.95 | 3.48 | 44.67 | 70.33            |
| GCA_003519185           | Neamphius huxleyi metagenome          | 68.15 | 0.0  | 2.13 | 40.87 | 69.12            |
| GCA_003542095           | marine                                | 60.07 | 0.0  | 1.95 | 42.23 | Failed Threshold |
| GCA_003447105           | marine                                | 61.28 | 0.05 | 1.92 | 37.44 | Failed Threshold |
| GCA_003508535           | marine                                | 51.11 | 0.0  | 2.24 | 55.22 | Failed Threshold |
| GCA_003505015           | hydrothermal vent                     | 75.96 | 3.15 | 2.71 | 41.51 | 63.35            |
| GCA_003507175           | hydrothermal vent                     | 60.27 | 0.0  | 2.31 | 36.46 | Failed Threshold |
| GCA_003497305           | hydrothermal vent                     | 72.2  | 0.84 | 2.49 | 39.1  | 70.87            |
| GCA_003541985           | marine                                | 67.36 | 0.84 | 2.48 | 44.62 | 64.09            |
| GCA_003510845           | marine                                | 66.69 | 1.68 | 2.14 | 42.57 | 60.23            |
| 14_54                   | Red Sea brine pool                    | 87.34 | 0.17 | 3.45 | 43.43 | 87.72            |
| 14_55                   | Red Sea brine pool                    | 87.02 | 0.0  | 2.85 | 42.74 | 89.24            |
| RIS_MetaBAT_11f-contigs | Ross Ice Shelf Antarctica             | 79.08 | 0.89 | 2.47 | 57.09 | 77.09            |
| RIS_MetaBAT_3f-contigs  | Ross Ice Shelf Antarctica             | 81.27 | 1.01 | 1.93 | 40.12 | 77.69            |
| SAR324_MaxBin_bins.001  | Malaspina Deep Sea Samples            | 91.15 | 2.69 | 2.61 | 42.46 | 80.38            |
| SAR324_MaxBin_bins.003  | Malaspina Deep Sea Samples            | 91.26 | 0.63 | 2.77 | 42.98 | 89.6             |
| SAR324_MetaBAT_bins.001 | Malaspina Deep Sea Samples            | 86.22 | 0.0  | 2.34 | 43.17 | 88.3             |
| sample_7_b1             | 45° N, 178° E, Deep Sea               | 65.19 | 1.58 | 1.8  | 40.91 | 59.48            |

**Table S2.** Presence/Absence matrix from selected genes in all our MAGs. 0 means the gene is absent, 1 that it is present. This matrix is based on the myrast annotations. The columns represent the following genomes: X1=GCA\_002401295; X2 = CA\_001781945; X3 = GCA\_001783695; X4 = GCA\_002753255; X5 = GCA\_002683655, X6 = GCA\_003506525; X7=GCA\_002690525; X8 = GCA\_003541985; X9 = GCA\_002726945; X10 = GCA\_002313905; X11=RIS\_MetaBAT\_11; X12 = GCA\_002327995; X13 = GCA\_001469005; X14 =GCA\_001627675; X15=GCA\_002689755; X16 = GCA\_001627845; X17 = GCA\_002082305; X18 = GCA\_003519185; X19=sample\_7\_b1, X20 = malaspina001; X21 = malaspina003, X22 = RIS\_MetaBAT\_3; X23=GCA\_002704555, X24 = GCA\_002685535; X25 =14\_54

Gene abbreviations are explained at the end of the Table.

| X         | X1 | X2 | X3 | X4 | X5 | X6 | X7 | X8 | X9 | X10 | X11 | X12 | X13 | X14 | X15 | X16 | X17 | X18 | X19 | X20 | X21 | X22 | X23 | X24 | X25 |
|-----------|----|----|----|----|----|----|----|----|----|-----|-----|-----|-----|-----|-----|-----|-----|-----|-----|-----|-----|-----|-----|-----|-----|
| AprA      | 0  | 0  | 0  | 0  | 0  | 0  | 0  | 0  | 0  | 0   | 0   | 1   | 0   | 0   | 0   | 1   | 1   | 1   | 0   | 0   | 0   | 0   | 0   | 0   | 1   |
| AprB      | 0  | 0  | 0  | 0  | 0  | 0  | 0  | 0  | 0  | 0   | 0   | 1   | 0   | 0   | 0   | 1   | 1   | 1   | 0   | 0   | 0   | 0   | 0   | 0   | 1   |
| Dsr_a     | 0  | 1  | 1  | 0  | 0  | 0  | 0  | 0  | 0  | 0   | 0   | 1   | 0   | 0   | 0   | 0   | 0   | 0   | 0   | 0   | 0   | 0   | 0   | 0   | 1   |
| Dsr_b     | 0  | 1  | 1  | 0  | 0  | 0  | 0  | 0  | 0  | 0   | 0   | 1   | 0   | 0   | 0   | 0   | 0   | 0   | 0   | 0   | 0   | 0   | 0   | 0   | 1   |
| sat       | 1  | 1  | 1  | 0  | 0  | 0  | 0  | 0  | 0  | 0   | 0   | 0   | 0   | 0   | 0   | 0   | 0   | 0   | 0   | 0   | 0   | 0   | 0   | 0   | 0   |
| Fd_sulred | 1  | 0  | 1  | 1  | 0  | 0  | 0  | 0  | 0  | 0   | 1   | 0   | 0   | 0   | 0   | 1   | 1   | 0   | 0   | 1   | 1   | 0   | 0   | 1   | 0   |
| SoxY      | 0  | 0  | 0  | 0  | 1  | 1  | 0  | 0  | 0  | 1   | 0   | 1   | 1   | 0   | 0   | 1   | 1   | 0   | 1   | 0   | 1   | 1   | 1   | 1   | 1   |
| SoxX      | 0  | 0  | 0  | 0  | 1  | 1  | 0  | 0  | 0  | 0   | 0   | 0   | 0   | 0   | 0   | 0   | 0   | 0   | 0   | 0   | 0   | 0   | 0   | 0   | 0   |
| SoxA      | 0  | 0  | 0  | 0  | 1  | 1  | 0  | 0  | 0  | 0   | 0   | 0   | 0   | 0   | 0   | 0   | 0   | 0   | 0   | 0   | 0   | 0   | 0   | 0   | 1   |
| SoxZ      | 0  | 0  | 0  | 0  | 1  | 1  | 0  | 0  | 0  | 0   | 0   | 0   | 1   | 0   | 0   | 0   | 0   | 0   | 0   | 0   | 0   | 0   | 0   | 0   | 1   |
| SulP      | 0  | 0  | 1  | 1  | 0  | 0  | 0  | 0  | 0  | 0   | 0   | 1   | 0   | 0   | 0   | 0   | 0   | 0   | 0   | 0   | 0   | 0   | 0   | 0   | 0   |
| Acsb_a_b  | 0  | 0  | 0  | 0  | 0  | 0  | 0  | 0  | 0  | 1   | 0   | 1   | 0   | 1   | 1   | 1   | 0   | 0   | 0   | 0   | 0   | 0   | 0   | 1   | 1   |
| CoxL_med  | 0  | 0  | 0  | 0  | 1  | 1  | 1  | 1  | 1  | 1   | 1   | 1   | 1   | 1   | 1   | 1   | 1   | 1   | 0   | 0   | 1   | 0   | 1   | 0   | 1   |
| CoxL_sml  | 0  | 0  | 0  | 0  | 1  | 1  | 1  | 1  | 1  | 1   | 1   | 1   | 1   | 1   | 1   | 1   | 1   | 1   | 1   | 0   | 1   | 0   | 1   | 0   | 1   |
| CoxL_lrg  | 0  | 0  | 0  | 0  | 1  | 1  | 1  | 0  | 1  | 1   | 1   | 1   | 1   | 1   | 1   | 1   | 1   | 1   | 1   | 1   | 1   | 1   | 1   | 0   | 1   |
| CoxL_D    | 0  | 1  | 0  | 0  | 1  | 1  | 1  | 1  | 1  | 1   | 1   | 1   | 1   | 1   | 0   | 1   | 1   | 0   | 1   | 0   | 1   | 1   | 0   | 0   | 1   |
| CoxL_E    | 0  | 0  | 0  | 0  | 1  | 1  | 1  | 1  | 1  | 1   | 0   | 1   | 1   | 1   | 0   | 1   | 1   | 1   | 0   | 1   | 1   | 0   | 1   | 1   | 0   |
| CoxL_I    | 0  | 0  | 0  | 0  | 1  | 1  | 0  | 0  | 0  | 1   | 1   | 1   | 1   | 1   | 1   | 1   | 1   | 1   | 1   | 0   | 0   | 0   | 0   | 0   | 0   |
| ForDH     | 0  | 0  | 0  | 0  | 0  | 0  | 0  | 0  | 1  | 1   | 1   | 1   | 1   | 1   | 1   | 1   | 1   | 1   | 1   | 1   | 1   | 1   | 1   | 1   | 1   |
| FormLig   | 0  | 0  | 0  | 0  | 0  | 0  | 0  | 0  | 1  | 1   | 1   | 0   | 1   | 1   | 1   | 1   | 1   | 1   | 1   | 1   | 1   | 1   | 0   | 1   | 1   |
| MetTHF    | 0  | 1  | 1  | 1  | 0  | 1  | 1  | 0  | 1  | 1   | 0   | 1   | 1   | 0   | 1   | 1   | 1   | 1   | 1   | 1   | 1   | 1   | 1   | 1   | 1   |
| MetRdc    | 0  | 1  | 1  | 1  | 1  | 1  | 1  | 0  | 1  | 1   | 1   | 1   | 1   | 1   | 1   | 1   | 1   | 1   | 1   | 1   | 1   | 1   | 1   | 1   | 1   |
| acsE      | 1  | 1  | 1  | 1  | 1  | 1  | 1  | 0  | 1  | 1   | 1   | 1   | 1   | 1   | 0   | 1   | 1   | 1   | 1   | 1   | 1   | 1   | 1   | 1   | 1   |
| aCoA      | 1  | 1  | 1  | 1  | 1  | 1  | 1  | 1  | 0  | 1   | 1   | 1   | 1   | 1   | 1   | 1   | 1   | 1   | 1   | 1   | 1   | 1   | 1   | 1   | 1   |
| Hyd_lrg   | 0  | 1  | 1  | 1  | 0  | 0  | 1  | 0  | 0  | 0   | 0   | 1   | 0   | 0   | 0   | 0   | 0   | 0   | 0   | 0   | 0   | 0   | 0   | 0   | 0   |
| Hyd_sml   | 0  | 1  | 1  | 0  | 0  | 0  | 1  | 0  | 0  | 0   | 0   | 1   | 0   | 0   | 0   | 0   | 0   | 0   | 0   | 0   | 0   | 0   | 0   | 0   | 0   |
| CoBCoM_b  | 0  | 0  | 0  | 0  | 0  | 0  | 0  | 0  | 0  | 0   | 0   | 1   | 0   | 0   | 1   | 1   | 0   | 0   | 0   | 0   | 0   | 0   | 0   | 0   | 0   |
| CoBCoM_a  | 0  | 0  | 0  | 0  | 0  | 0  | 0  | 0  | 0  | 0   | 0   | 1   | 0   | 0   | 1   | 1   | 1   | 1   | 0   | 0   | 0   | 0   | 0   | 0   | 1   |
| CoBCoM_c  | 0  | 0  | 0  | 0  | 0  | 0  | 0  | 0  | 0  | 0   | 0   | 1   | 0   | 0   | 1   | 1   | 0   | 0   | 0   | 0   | 0   | 0   | 0   | 0   | 0   |
| NirK      | 0  | 0  | 0  | 0  | 0  | 0  | 0  | 0  | 0  | 0   | 0   | 0   | 0   | 0   | 0   | 0   | 0   | 0   | 0   | 0   | 0   | 0   | 0   | 0   | 0   |
| Nir       | 0  | 0  | 0  | 0  | 0  | 0  | 0  | 0  | 0  | 0   | 0   | 0   | 0   | 0   | 0   | 0   | 0   | 0   | 0   | 0   | 0   | 0   | 0   | 0   | 0   |
| NirS_sml  | 0  | 0  | 0  | 0  | 0  | 0  | 0  | 0  | 0  | 0   | 0   | 0   | 0   | 0   | 0   | 0   | 0   | 0   | 0   | 0   | 0   | 0   | 0   | 0   | 0   |
| NirS      | 1  | 0  | 0  | 0  | 0  | 0  | 0  | 0  | 0  | 0   | 0   | 0   | 0   | 0   | 0   | 0   | 0   | 0   | 0   | 0   | 0   | 0   | 0   | 0   | 1   |
| NitNADH   | 1  | 0  | 0  | 0  | 0  | 0  | 0  | 0  | 0  | 0   | 0   | 0   | 0   | 0   | 0   | 0   | 0   | 0   | 0   | 0   | 0   | 0   | 0   | 0   | 0   |
| NitTrans  | 1  | 0  | 0  | 0  | 0  | 0  | 0  | 0  | 1  | 0   | 0   | 1   | 0   | 0   | 0   | 1   | 0   | 0   | 1   | 1   | 1   | 0   | 0   | 1   | 0   |
| DmdA      | 0  | 0  | 0  | 0  | 0  | 0  | 0  | 0  | 0  | 0   | 0   | 1   | 1   | 1   | 0   | 0   | 0   | 0   | 0   | 0   | 0   | 0   | 1   | 0   | 0   |
| Rbsco_lrg | 0  | 0  | 0  | 0  | 0  | 0  | 0  | 0  | 0  | 0   | 0   | 0   | 0   | 0   | 0   | 1   | 0   | 1   | 0   | 1   | 1   | 0   | 0   | 1   | 1   |
| Rbsc_sml  | 0  | 0  | 0  | 0  | 0  | 0  | 0  | 0  | 0  | 0   | 0   | 0   | 0   | 0   | 0   | 1   | 0   | 1   | 0   | 1   | 0   | 0   | 0   | 1   | 1   |
| CbbQ      | 0  | 0  | 0  | 0  | 0  | 0  | 0  | 0  | 0  | 0   | 0   | 0   | 0   | 0   | 0   | 1   | 0   | 1   | 0   | 1   | 0   | 0   | 0   | 1   | 1   |
| CbbO      | 0  | 0  | 0  | 0  | 0  | 0  | 0  | 0  | 0  | 0   | 0   | 0   | 0   | 0   | 0   | 1   | 0   | 1   | 0   | 1   | 1   | 1   | 0   | 1   | 1   |
| Trnskt    | 0  | 1  | 1  | 1  | 0  | 1  | 1  | 1  | 0  | 1   | 1   | 1   | 1   | 1   | 1   | 1   | 1   | 1   | 0   | 1   | 0   | 1   | 0   | 1   | 1   |

|         |   |   |   |   |   |   |   |   |   |   |   |   |   |   |   |   |   |   |   |   |   |   |   |   |
|---------|---|---|---|---|---|---|---|---|---|---|---|---|---|---|---|---|---|---|---|---|---|---|---|---|
| Aldol   | 0 | 0 | 0 | 0 | 1 | 1 | 1 | 1 | 0 | 0 | 0 | 1 | 1 | 1 | 1 | 1 | 1 | 1 | 0 | 0 | 0 | 0 | 0 | 0 |
| AldolI  | 0 | 1 | 1 | 0 | 1 | 0 | 0 | 0 | 1 | 1 | 1 | 0 | 0 | 0 | 0 | 1 | 1 | 1 | 0 | 1 | 0 | 1 | 0 | 1 |
| Cal1    | 0 | 0 | 0 | 0 | 0 | 0 | 0 | 0 | 0 | 0 | 0 | 0 | 0 | 0 | 0 | 1 | 0 | 0 | 0 | 1 | 0 | 1 | 0 | 1 |
| Cal2    | 0 | 1 | 1 | 1 | 1 | 1 | 1 | 1 | 1 | 1 | 1 | 1 | 1 | 1 | 0 | 1 | 1 | 1 | 0 | 1 | 1 | 1 | 1 | 1 |
| RibEmi  | 1 | 1 | 1 | 1 | 1 | 1 | 1 | 0 | 1 | 1 | 1 | 1 | 1 | 1 | 1 | 1 | 1 | 0 | 0 | 1 | 1 | 1 | 0 | 1 |
| Cal3A   | 0 | 0 | 0 | 1 | 0 | 1 | 1 | 1 | 0 | 1 | 1 | 1 | 1 | 1 | 1 | 1 | 1 | 1 | 1 | 1 | 1 | 1 | 1 | 1 |
| Cal3B   | 1 | 1 | 1 | 0 | 0 | 0 | 0 | 0 | 0 | 0 | 0 | 0 | 0 | 0 | 0 | 0 | 0 | 0 | 0 | 0 | 0 | 0 | 0 | 0 |
| PhyCoA  | 1 | 0 | 0 | 0 | 1 | 1 | 1 | 1 | 1 | 1 | 1 | 1 | 1 | 1 | 1 | 1 | 1 | 1 | 1 | 1 | 1 | 1 | 1 | 1 |
| Prot    | 0 | 0 | 0 | 0 | 1 | 1 | 1 | 1 | 0 | 0 | 0 | 0 | 0 | 0 | 0 | 0 | 0 | 0 | 0 | 0 | 0 | 0 | 0 | 0 |
| BenzLig | 0 | 0 | 0 | 0 | 0 | 0 | 0 | 0 | 0 | 0 | 0 | 1 | 1 | 1 | 1 | 1 | 1 | 1 | 1 | 0 | 0 | 1 | 1 | 1 |
| BoxB    | 0 | 0 | 0 | 0 | 0 | 0 | 0 | 0 | 0 | 1 | 1 | 1 | 1 | 1 | 1 | 1 | 1 | 1 | 1 | 1 | 1 | 1 | 1 | 0 |
| BoxC    | 0 | 0 | 0 | 0 | 0 | 0 | 0 | 0 | 0 | 0 | 1 | 1 | 1 | 1 | 1 | 1 | 1 | 1 | 0 | 1 | 1 | 1 | 1 | 0 |
| BoxE    | 1 | 0 | 0 | 0 | 0 | 0 | 0 | 0 | 0 | 1 | 0 | 0 | 1 | 1 | 0 | 1 | 1 | 1 | 0 | 1 | 1 | 1 | 1 | 0 |
| BrngHyd | 0 | 0 | 0 | 0 | 0 | 0 | 0 | 0 | 0 | 0 | 0 | 0 | 0 | 0 | 0 | 1 | 1 | 1 | 0 | 1 | 1 | 1 | 1 | 0 |
| pcaF    | 0 | 0 | 0 | 0 | 0 | 0 | 0 | 0 | 0 | 1 | 0 | 1 | 1 | 0 | 0 | 0 | 1 | 1 | 0 | 1 | 1 | 1 | 1 | 0 |
| iorA    | 0 | 0 | 0 | 0 | 1 | 1 | 1 | 1 | 1 | 0 | 1 | 1 | 1 | 1 | 0 | 1 | 1 | 1 | 1 | 1 | 0 | 1 | 1 | 0 |
| iorB    | 0 | 0 | 0 | 0 | 1 | 1 | 1 | 1 | 1 | 0 | 1 | 1 | 1 | 1 | 0 | 1 | 1 | 1 | 1 | 1 | 0 | 1 | 1 | 0 |
| Paal    | 1 | 0 | 0 | 0 | 0 | 0 | 0 | 0 | 0 | 1 | 1 | 0 | 0 | 0 | 0 | 0 | 1 | 1 | 0 | 0 | 0 | 0 | 0 | 1 |
| PaaD    | 0 | 0 | 0 | 0 | 0 | 0 | 0 | 0 | 0 | 1 | 1 | 1 | 1 | 0 | 0 | 1 | 0 | 0 | 0 | 0 | 0 | 0 | 1 | 0 |
| NADHUb  | 0 | 0 | 0 | 1 | 1 | 1 | 1 | 1 | 1 | 1 | 1 | 1 | 1 | 1 | 0 | 1 | 1 | 1 | 0 | 0 | 1 | 1 | 0 | 1 |
| SuccDeh | 1 | 1 | 1 | 1 | 1 | 1 | 1 | 1 | 1 | 1 | 1 | 1 | 1 | 1 | 1 | 1 | 1 | 1 | 1 | 1 | 1 | 1 | 1 | 1 |
| c553    | 0 | 0 | 0 | 1 | 1 | 1 | 0 | 0 | 1 | 1 | 1 | 1 | 1 | 1 | 1 | 1 | 1 | 1 | 1 | 1 | 1 | 0 | 1 | 1 |
| c4      | 0 | 0 | 0 | 0 | 1 | 0 | 1 | 1 | 1 | 1 | 1 | 1 | 1 | 1 | 1 | 1 | 1 | 1 | 1 | 1 | 1 | 1 | 1 | 1 |
| c2      | 1 | 0 | 0 | 1 | 0 | 0 | 0 | 0 | 0 | 0 | 0 | 0 | 0 | 0 | 0 | 0 | 0 | 0 | 0 | 0 | 0 | 0 | 0 | 1 |
| c551    | 1 | 1 | 1 | 0 | 0 | 0 | 0 | 0 | 0 | 0 | 0 | 1 | 1 | 1 | 0 | 0 | 0 | 0 | 0 | 0 | 0 | 0 | 0 | 1 |
| b558    | 0 | 0 | 0 | 1 | 1 | 1 | 1 | 0 | 1 | 1 | 0 | 1 | 1 | 1 | 1 | 1 | 1 | 1 | 1 | 1 | 1 | 1 | 1 | 1 |
| fcC     | 0 | 0 | 0 | 0 | 0 | 1 | 0 | 0 | 0 | 1 | 0 | 0 | 0 | 0 | 0 | 1 | 0 | 1 | 0 | 1 | 0 | 0 | 0 | 1 |
| cbb3    | 0 | 0 | 0 | 0 | 0 | 0 | 0 | 0 | 0 | 0 | 0 | 0 | 0 | 0 | 0 | 0 | 0 | 0 | 0 | 0 | 0 | 0 | 0 | 0 |
| cheA    | 1 | 1 | 1 | 1 | 1 | 1 | 1 | 1 | 0 | 0 | 0 | 1 | 1 | 1 | 1 | 1 | 0 | 0 | 1 | 1 | 1 | 0 | 1 | 1 |
| cheW    | 1 | 1 | 1 | 1 | 1 | 1 | 1 | 1 | 0 | 0 | 0 | 1 | 1 | 1 | 1 | 1 | 0 | 0 | 0 | 0 | 1 | 0 | 1 | 0 |
| cheB    | 1 | 1 | 1 | 1 | 1 | 1 | 1 | 1 | 1 | 0 | 0 | 1 | 1 | 1 | 1 | 1 | 0 | 0 | 0 | 0 | 1 | 0 | 1 | 1 |
| cheY    | 1 | 1 | 1 | 1 | 1 | 1 | 1 | 1 | 1 | 0 | 0 | 0 | 0 | 0 | 0 | 1 | 1 | 1 | 1 | 1 | 1 | 0 | 0 | 1 |
| fliM    | 1 | 1 | 1 | 1 | 1 | 1 | 1 | 1 | 1 | 1 | 1 | 1 | 1 | 1 | 1 | 1 | 1 | 1 | 1 | 1 | 1 | 1 | 1 | 1 |
| CtxP1   | 1 | 1 | 1 | 1 | 1 | 1 | 1 | 1 | 0 | 1 | 0 | 1 | 1 | 1 | 1 | 1 | 0 | 0 | 1 | 1 | 1 | 1 | 1 | 1 |
| AceKin  | 0 | 1 | 1 | 1 | 0 | 0 | 0 | 0 | 0 | 0 | 0 | 1 | 1 | 1 | 0 | 0 | 0 | 0 | 0 | 0 | 0 | 0 | 0 | 0 |
| Met1    | 0 | 0 | 0 | 0 | 0 | 0 | 0 | 0 | 0 | 0 | 0 | 0 | 0 | 0 | 0 | 0 | 0 | 0 | 0 | 0 | 0 | 0 | 1 | 0 |
| Met2    | 0 | 0 | 0 | 0 | 0 | 1 | 1 | 0 | 0 | 0 | 0 | 1 | 1 | 0 | 0 | 0 | 0 | 0 | 0 | 0 | 0 | 0 | 0 | 0 |
| Met3    | 1 | 1 | 1 | 1 | 1 | 0 | 1 | 1 | 1 | 1 | 0 | 1 | 1 | 1 | 1 | 0 | 1 | 1 | 1 | 0 | 1 | 1 | 1 | 1 |
| Met4    | 0 | 1 | 1 | 1 | 1 | 0 | 1 | 0 | 1 | 1 | 0 | 1 | 1 | 0 | 0 | 0 | 0 | 0 | 0 | 0 | 0 | 0 | 0 | 0 |
| Met5    | 1 | 1 | 1 | 1 | 1 | 1 | 1 | 0 | 1 | 1 | 1 | 1 | 1 | 1 | 1 | 1 | 1 | 0 | 0 | 1 | 1 | 1 | 0 | 1 |
| AlcDeg  | 0 | 0 | 0 | 0 | 0 | 1 | 0 | 0 | 0 | 0 | 0 | 1 | 1 | 1 | 0 | 1 | 1 | 0 | 1 | 0 | 1 | 1 | 0 | 0 |

|            |   |   |   |   |   |   |   |   |   |   |   |   |   |   |   |   |   |   |   |   |   |   |   |
|------------|---|---|---|---|---|---|---|---|---|---|---|---|---|---|---|---|---|---|---|---|---|---|---|
| ABCS       | 0 | 0 | 0 | 1 | 0 | 1 | 0 | 0 | 0 | 0 | 0 | 1 | 1 | 0 | 0 | 1 | 0 | 1 | 0 | 0 | 0 | 0 | 1 |
| ABCOP      | 1 | 1 | 1 | 1 | 1 | 1 | 1 | 1 | 1 | 1 | 1 | 1 | 1 | 1 | 1 | 1 | 1 | 0 | 0 | 1 | 0 | 0 | 1 |
| ABCAA      | 1 | 1 | 1 | 1 | 1 | 1 | 0 | 1 | 0 | 1 | 1 | 1 | 1 | 1 | 1 | 1 | 1 | 1 | 1 | 1 | 1 | 1 | 0 |
| ABCLPS     | 0 | 1 | 1 | 1 | 1 | 0 | 1 | 1 | 0 | 1 | 1 | 1 | 1 | 1 | 1 | 0 | 0 | 1 | 0 | 0 | 0 | 0 | 1 |
| TCA1       | 0 | 1 | 1 | 1 | 0 | 0 | 0 | 0 | 0 | 0 | 0 | 0 | 1 | 1 | 0 | 0 | 1 | 1 | 1 | 1 | 1 | 1 | 1 |
| TCA2       | 0 | 0 | 0 | 0 | 1 | 1 | 1 | 1 | 0 | 0 | 0 | 0 | 0 | 0 | 0 | 0 | 0 | 0 | 0 | 0 | 0 | 0 | 0 |
| TCA3       | 0 | 0 | 0 | 0 | 0 | 0 | 0 | 0 | 1 | 0 | 1 | 1 | 1 | 1 | 1 | 1 | 1 | 1 | 0 | 0 | 1 | 0 | 1 |
| Gly1       | 1 | 1 | 1 | 1 | 1 | 0 | 1 | 1 | 1 | 1 | 0 | 1 | 1 | 1 | 1 | 0 | 1 | 1 | 1 | 0 | 1 | 1 | 1 |
| Gly2       | 1 | 1 | 0 | 1 | 1 | 1 | 1 | 0 | 0 | 0 | 0 | 1 | 1 | 1 | 1 | 1 | 1 | 1 | 1 | 1 | 1 | 1 | 1 |
| Gly3       | 0 | 1 | 1 | 0 | 1 | 0 | 0 | 0 | 1 | 1 | 1 | 0 | 0 | 0 | 0 | 1 | 1 | 1 | 0 | 1 | 0 | 1 | 1 |
| Gly4       | 0 | 0 | 0 | 0 | 1 | 1 | 1 | 1 | 0 | 0 | 0 | 1 | 1 | 1 | 1 | 1 | 1 | 1 | 0 | 0 | 0 | 0 | 0 |
| Gly5       | 0 | 1 | 1 | 1 | 1 | 1 | 1 | 0 | 1 | 1 | 1 | 1 | 1 | 1 | 1 | 1 | 1 | 1 | 1 | 1 | 1 | 0 | 1 |
| Gly6       | 1 | 0 | 0 | 0 | 0 | 0 | 0 | 0 | 1 | 1 | 0 | 1 | 0 | 0 | 0 | 1 | 0 | 0 | 1 | 1 | 0 | 0 | 1 |
| FormaldUse | 0 | 0 | 0 | 1 | 1 | 0 | 1 | 0 | 1 | 1 | 1 | 1 | 1 | 0 | 1 | 1 | 1 | 1 | 0 | 1 | 1 | 1 | 0 |
| CytC       | 1 | 0 | 0 | 1 | 1 | 1 | 0 | 1 | 1 | 1 | 1 | 1 | 1 | 1 | 0 | 1 | 1 | 1 | 0 | 1 | 1 | 1 | 1 |

Gene abbreviations in Supplementary Table 2 stand for:

Apr\_mmb = Adenylylsulfate reductase membrane anchor

Apr\_put = Phosphoadenylyl-sulfate reductase thioredoxin / Adenylyl-sulfate reductase thioredoxin

AprA = Adenylylsulfate reductase alpha-subunit

AprB = Adenylylsulfate reductase beta-subunit

Dsr\_a = Dissimilatory sulfite reductase, alpha subunit

Dsr\_b = Dissimilatory sulfite reductase, beta subunit

sat = Sulfate adenylyltransferase subunit 1 / Adenylylsulfate kinase

Dsr\_put = Probable sulfite reductase

Fd\_sulred = Ferredoxin--sulfite reductase

SoxY = Sulfur oxidation protein SoxY

SoxX = Sulfur oxidation protein SoxX

SoxA = sulfur oxidation protein SoxA

SoxZ = Sulfur oxidation protein SoxZ

SulP = Sulfate permease

Acsb\_a\_b Acetyl-CoA synthetase (ADP-forming) alpha and beta chains, putative

Acsb\_a = Acetyl-CoA synthetase (ADP-forming) alpha chain

CoxL\_med = Carbon monoxide dehydrogenase medium chain

CoxL\_sml = Carbon monoxide dehydrogenase small chain

CoxL\_lrg = Carbon monoxide dehydrogenase large chain

CoxL\_D = carbon monoxide dehydrogenase D protein

CoxL\_E = carbon monoxide dehydrogenase E protein

CoxL\_I = Carbon monoxide dehydrogenase form I, large chain

FormLig = Formate--tetrahydrofolate ligase

MetTHF = Methylene-tetrahydrofolate dehydrogenase

MetRdc = 5,10-methylene-tetrahydrofolate reductase

acsE = 5-methyltetrahydrofolate--homocysteine methyltransferase

ForDH = tungsten-containing formate dehydrogenase alpha subunit

aCoA = Acetyl-coenzyme A synthetase

Hyd\_lrg = Uptake hydrogenase large subunit

Hyd\_sml = Uptake hydrogenase small subunit precursor

CoBCoM\_b = CoB--CoM heterodisulfide reductase subunit B

CoBCoM\_a = CoB--CoM heterodisulfide reductase subunit A  
 CoBCoM\_c = CoB--CoM heterodisulfide reductase subunit C  
 NirK = Copper-containing nitrite reductase  
 Nir = Ferredoxin--nitrite reductase  
 NirS\_sml = Cytochrome c nitrite reductase, small subunit NrfH  
 NirS = Cytochrome cd1 nitrite reductase  
 NitNADH = Nitrite reductase [NAD  
 NitTrans = Nitrate/nitrite transporter  
 DmdA = DMSP demethylase  
 Rbsco\_lrg = Ribulose biphosphate carboxylase large chain  
 Rbsc = Ribulose biphosphate carboxylase  
 Rbsc\_sml = Ribulose biphosphate carboxylase small chain  
 CbbQ = Rubisco activation protein CbbQ  
 CbbO = Rubisco activation protein CbbO  
 CbbR = Rubisco operon transcriptional regulator CbbR  
 Trnskt = Transketolase  
 Aldol = Fructose-bisphosphate aldolase class I  
 AldolI = Fructose-bisphosphate aldolase class II  
 Cal1 = Uridine kinase  
 Cal2 = Phosphoglycerate kinase  
 Cal3A = Ribose 5-phosphate isomerase A  
 Cal3B = Ribose 5-phosphate isomerase B  
 RibEmi = Ribulose-phosphate 3-epimerase  
 PhyCoA = Phytanoyl-CoA dioxygenase  
 Prot = Proteorhodopsin  
 BenzLig = Benzoate-CoA ligase  
 BoxB = Benzoyl-CoA oxygenase component B  
 BoxC = Benzoyl-CoA-dihydrodiol lyase  
 BoxE = Acetyl-CoA acetyltransferase  
 BrngHyd = benzoate degradation ring-cleavage hydrolase  
 pcaF = pcaF: 3-oxoadipyl-CoA thiolase  
 iorA = Isoquinoline 1-oxidoreductase alpha subunit  
 iorB = Isoquinoline 1-oxidoreductase beta subunit  
 Paal = putative protein Paal, possibly involved in aromatic compounds catabolism  
 PaaD = Phenylacetic acid degradation protein PaaD, thioesterase  
 NADHUb = NADH ubiquinone oxidoreductase chain A  
 SuccDeh = Succinate dehydrogenase iron-sulfur protein  
 c553, "Putative diheme cytochrome c-553  
 c4 = Cytochrome c4  
 c2 = Probable cytochrome c2  
 c551 = Cytochrome c551 peroxidase  
 b558 = Succinate dehydrogenase cytochrome b558 subunit  
 fcC = Sulfide dehydrogenase [flavocytochrome C] flavoprotein chain precursor  
 cbb3 = probable cytochrome oxidase  
 cheA = Signal transduction histidine kinase CheA  
 cheW = Positive regulator of CheA protein activity  
 cheB = Chemotaxis response regulator protein-glutamate methylesterase CheB  
 cheY = Chemotaxis regulator - transmits chemoreceptor signals to flagellar motor components CheY  
 fliM = Flagellar motor switch protein FliM  
 CtxP1 = Methyl-accepting chemotaxis protein I

AceKin = Acetate kinase  
 Met1 = 6-phosphogluconate dehydrogenase, decarboxylating  
 Met2 = 6-phosphogluconolactonase  
 Met3 = Glucose-6-phosphate isomerase  
 Met4 = Transaldolase  
 Met5 = Ribulose-phosphate 3-epimerase  
 AlcDeg = 3-hydroxyisobutyrate dehydrogenase  
 ABCS = ABC-type sugar transport system, permease component  
 ABCOP = Oligopeptide ABC transporter, periplasmic oligopeptide-binding protein  
 OppA  
 ABCAA = Branched-chain amino acid ABC transporter, amino acid-binding protein  
 ABCLPS = Lipopolysaccharide ABC transporter, ATP-binding protein LptB  
 TCA1 = Isocitrate dehydrogenase [NADP]  
 TCA2 = Ketoglutarate semialdehyde dehydrogenase  
 TCA3 = Propionyl-CoA carboxylase carboxyl transferase subunit  
 Gly1 = Glucose-6-phosphate isomerase  
 Gly2 = 6-phosphofructokinase  
 Gly3 = Fructose-bisphosphate aldolase class II  
 Gly4 = Fructose-bisphosphate aldolase class I  
 Gly5 = Triosephosphate isomerase  
 Gly6 = ROK family Glucokinase with ambiguous substrate specificity  
 FormaldUse = Serine hydroxymethyltransferase  
 CytC = Cytochrome c oxidase polypeptide I
